# Supplementary material for: Contribution of Whole-Genome Sequencing and Transcript Analysis to Decipher Retinal Diseases Associated with MFSD8 Variants
Source: MDPI journal article supplement (doi:10.3390/ijms23084294), 2022-04-13
Supplement: s1 [file s1]

**Supplementary Table S1: Progression of retinal degeneration.**

| Patient, sex  | Age at last examination | BCVA at last examination                                  | Fundus                                                                                                                                                                | Visual Field                                                                     | SW-FAF                                                                                                                              | SD-OCT                                                                                                             | Other                                                                        |
|---------------|-------------------------|-----------------------------------------------------------|-----------------------------------------------------------------------------------------------------------------------------------------------------------------------|----------------------------------------------------------------------------------|-------------------------------------------------------------------------------------------------------------------------------------|--------------------------------------------------------------------------------------------------------------------|------------------------------------------------------------------------------|
| L-08031428, M | 28                      | OU: 20/800                                                | Waxy pallor of ONH<br>Vascular narrowing<br>Bull's eye macular lesion<br>Whitish discoloration of midperipheral retina<br>Bone spicules in nasal midperipheral retina | 40° large absolute (V4e) central scotoma; preservation of peripheral V4e isopter | Large macular hypoAF round lesion with indistinct hyperAF edges<br>Large midperipheral ring of hypoAF with indistinct hyperAF edges | Widespread disappearance of outer reflective layers (ONL, EZ, RPE)<br>Dense irregular deposits at the level of RPE | ffERG: residual dark-adapted responses; unrecordable light-adapted responses |
| VV-51717, M   | 57                      | VA: 0.2 RE, 0.1 LE                                        | Bull's eye maculopathy                                                                                                                                                | Not repeated                                                                     | Macula: hypoAF area, surrounded by hyperAF ring<br>No changes in peripheral retina                                                  | Disappearance of outer layers (ONL, EZ, IS/OS, RPE) in the macula<br>Dense irregular deposits at the level of RPE  |                                                                              |
| VV-1595021, F | 20                      | VA: 0.2 RE, 0.25 LE                                       | Central foveal atrophy, peripheral retina within normal limits                                                                                                        | Not repeated                                                                     | Macula: hypoAF area, surrounded by hyperAF ring<br>No changes in peripheral retina                                                  | Disappearance of outer layers (ONL, EZ, IS/OS RPE) in the macula<br>Dense irregular deposits at the level of RPE   |                                                                              |
| HD-OPH4200, F | 53                      | VA :<br>RE : 0.2, P8<br>LE : 0.2, P8<br>Eccentric viewing | Loss of foveal reflex with a few discrete hypo-pigmented spots around the fovea                                                                                       | Bilateral relative central scotoma                                               | Macula: hypoAF area, surrounded by hyperAF ring<br>No changes in peripheral retina                                                  | Disappearance of outer layers (ONL, EZ, IS/OS, RPE) in the macula                                                  | Major photophobia                                                            |
| HD-OPH1206, M | 36                      | VA :<br>RE : 0.3ff ; P4f<br>LE : 0.3 f ; P5               | Bull's eye maculopathy                                                                                                                                                | Bilateral relative central scotoma                                               | Macula: hypoAF area, surrounded by hyperAF ring<br>No changes in peripheral retina                                                  | Disappearance of outer layers (ONL, EZ, IS/OS, RPE) in the macula<br>Dense irregular deposits at the level of RPE  |                                                                              |
