# Supplementary material for: Contribution of Whole-Genome Sequencing and Transcript Analysis to Decipher Retinal Diseases Associated with MFSD8 Variants
Source: MDPI journal article supplement (doi:10.3390/ijms23084294), 2022-04-13
Supplement: s1 [file s1]

**Supplementary Table S2 : Primers used in this study**

| <b>Name</b> | <b>5' Sequence 3'</b>    |                                                   |
|-------------|--------------------------|---------------------------------------------------|
| MFSD8_F     | CCTTTTGAACCATCATTACTC    | Transcript analysis for P1 LCLs                   |
| MFSD8_R     | TATTGTGCAAATCTTCCCACTG   |                                                   |
| MFSD8_syn_F | TCTAGGTCCAGTTTTTCAGACTTG | Transcript analysis for P2 and P3 LCLs            |
| MFSD8_syn_R | GGAGTAATGATGGTTTCAAAAAGG |                                                   |
| GAPDH_RT_F  | ACCCAGAAGACTGTGGATGG     | Transcript analysis for Housekeeping gene in LCLs |
| GAPDH_RT_R  | TTCTAGACGGCAGGTCAGG      |                                                   |
