# Supplementary material for: Contribution of Whole-Genome Sequencing and Transcript Analysis to Decipher Retinal Diseases Associated with MFSD8 Variants
Source: Int J Mol Sci. 2022 Apr 13;23(8):4294. doi: 10.3390/ijms23084294 (PMC9032189; doi:10.3390/ijms23084294)
Supplement: Supplementary file 1 [file ijms-23-04294-s001.zip]

Archive with 7 entries (7 files):
- Poncet et al_Supplementary Figures Legends_revised.pdf
- Supplementary Figure S1.tif
- Supplementary Figure S2.pdf
- Supplementary Figure S3.pdf
- Supplementary Figure S4.pdf
- Supplementary Table S1.pdf
- Supplementary Table S2.pdf
