# Supplementary figures and images for: Contribution of Whole-Genome Sequencing and Transcript Analysis to Decipher Retinal Diseases Associated with MFSD8 Variants
Source: MDPI journal article supplement (doi:10.3390/ijms23084294), 2022-04-13

**a)**

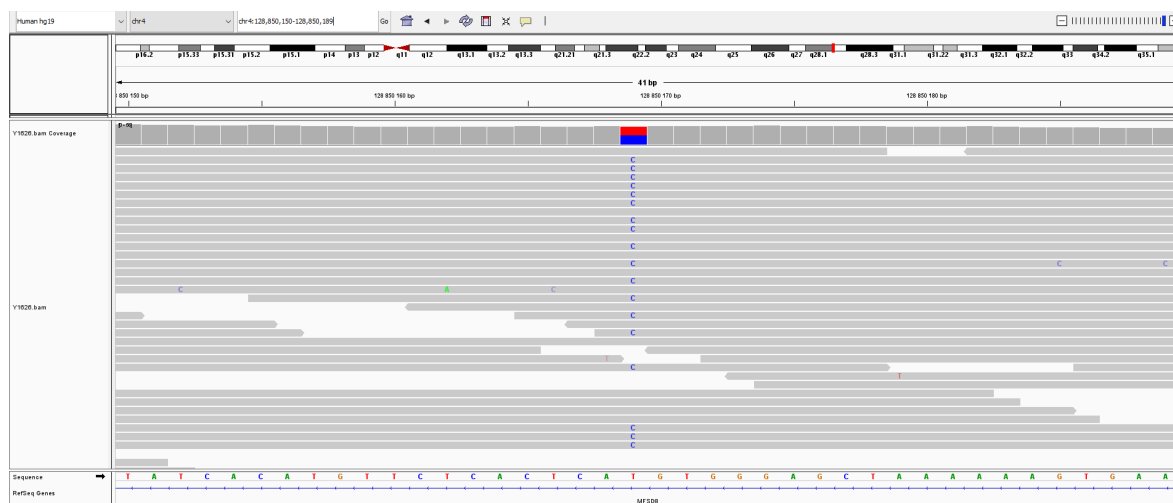

Intron 10

**b)**

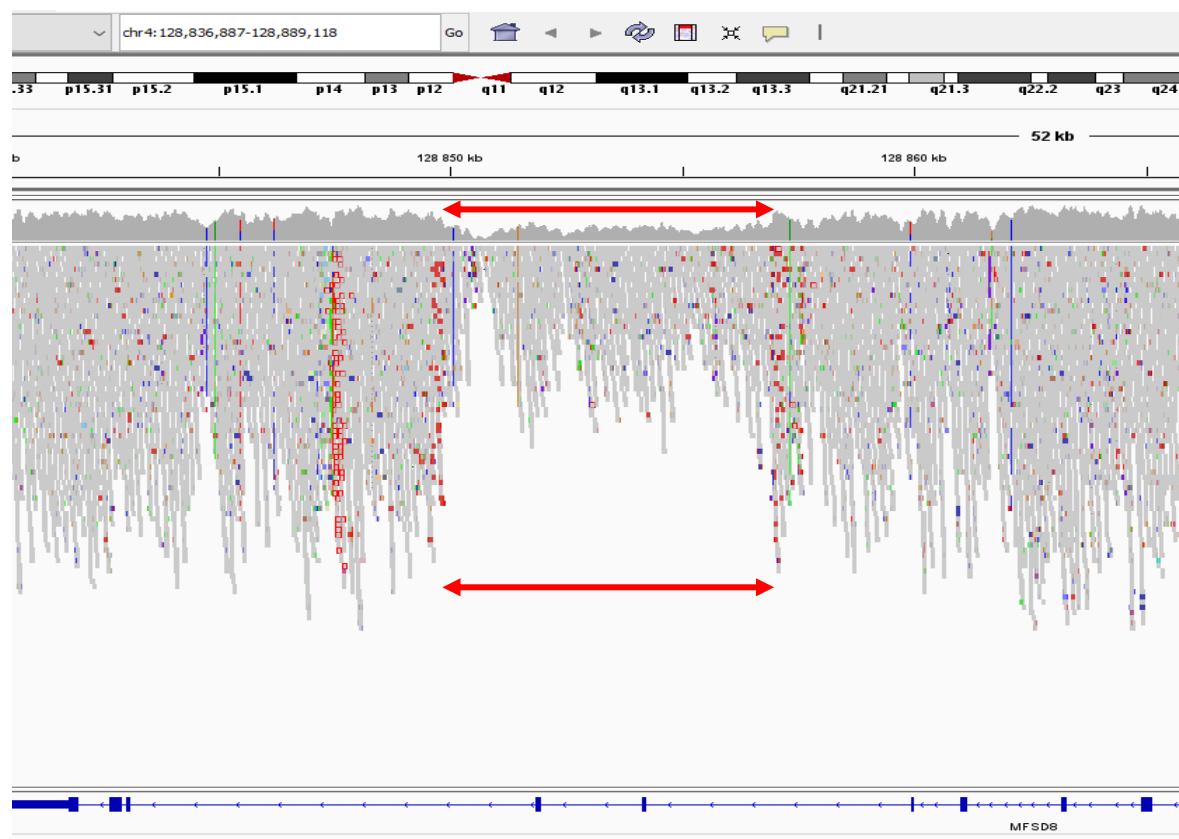

Exons 10 9

Supplement: s1 [file s1]

Supplementary Figure S4

a)

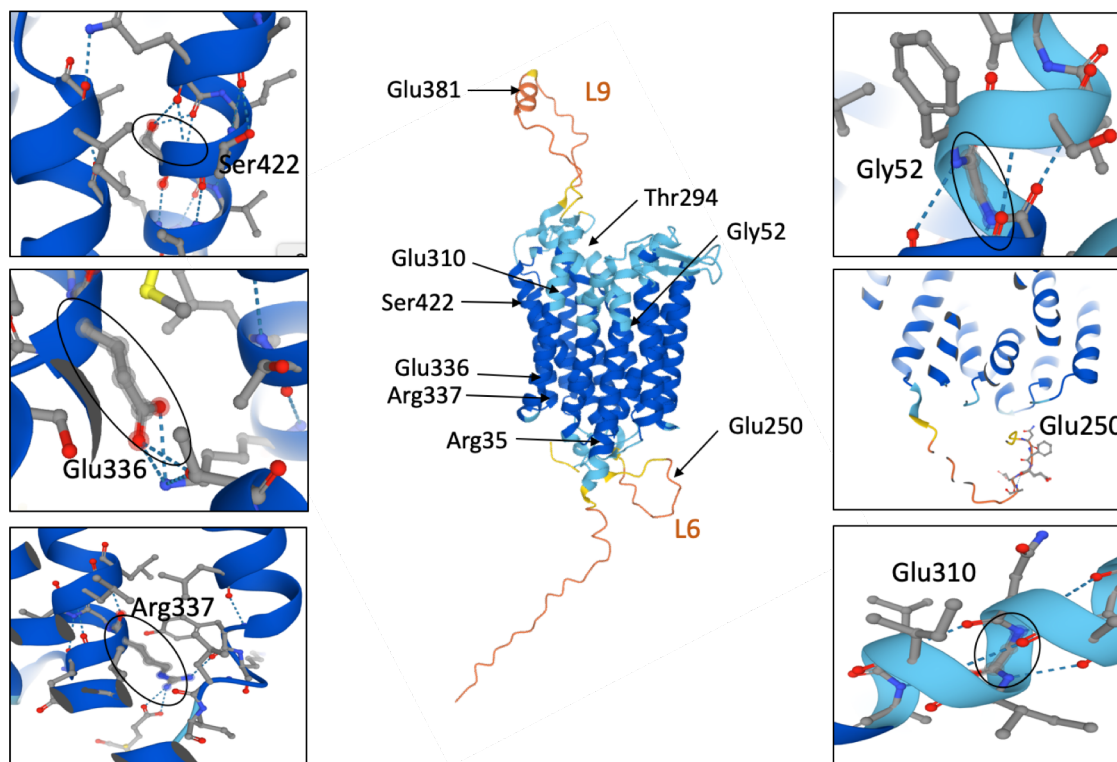

b)

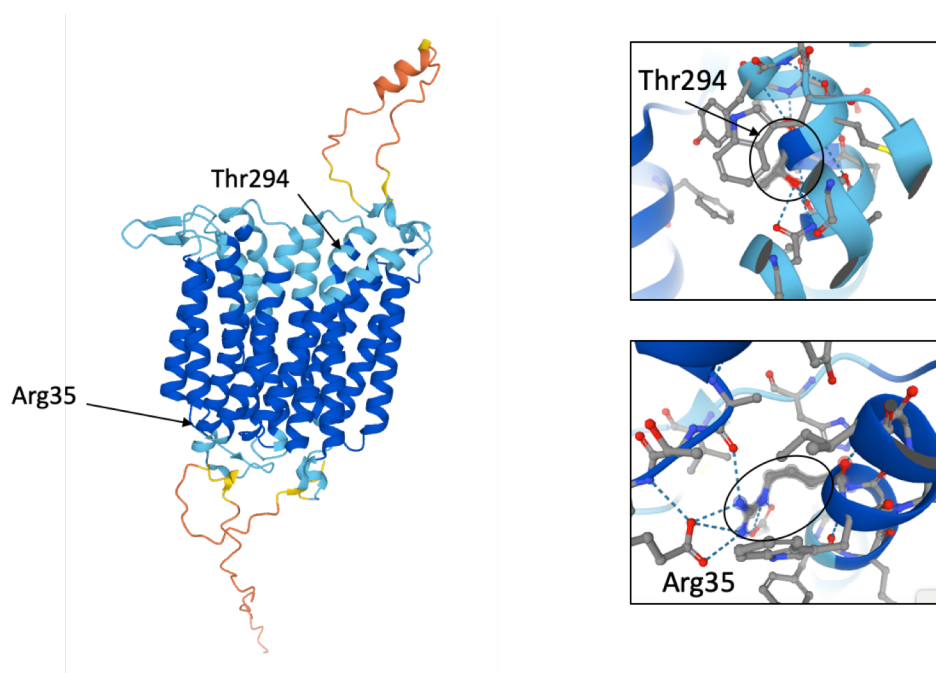

Supplement: s1 [file s1]
